# Supplementary material for: Increased transmissibility of SARS-CoV-2 lineage B.1.1.7 by age and viral load
Source: PubMed Central journal article supplement (PMC8669007; doi:10.1038/s41467-021-27202-x), 2021-12-13
Supplement: 41467_2021_27202_MOESM1_ESM.pdf [file 41467_2021_27202_MOESM1_ESM.pdf]

## Supplementary Information

# Increased Transmissibility of SARS-CoV-2 Lineage B.1.1.7 by Age and Viral Load

Frederik Plesner Lyngse<sup>1,2,3,\*</sup>,

Kåre Mølbak<sup>3,4</sup>,

Robert Leo Skov<sup>3</sup>,

Lasse Engbo Christiansen<sup>5</sup>,

Laust Hvas Mortensen<sup>6,7</sup>,

Mads Albertsen<sup>8</sup>,

Camilla Holten Møller<sup>3</sup>,

Tyra Grove Krause<sup>3</sup>,

Morten Rasmussen<sup>3</sup>,

Thomas Yssing Michaelsen<sup>8</sup>,

Marianne Voldstedlund<sup>3</sup>,

Jannik Fonager<sup>3</sup>,

Nina Steenhard<sup>3</sup>,

The Danish Covid-19 Genome Consortium,

Carsten Thure Kirkeby<sup>4</sup>

---

\* Correspondence to Frederik Plesner Lyngse, fpl@econ.ku.dk. Affiliations: <sup>1</sup>Department of Economics & Center for Economic Behaviour and Inequality, University of Copenhagen; <sup>2</sup>Danish Ministry of Health; <sup>3</sup>Statens Serum Institut; <sup>4</sup>Department of Veterinary and Animal Sciences, Faculty of Health and Medical Sciences, University of Copenhagen; <sup>5</sup>DTU Compute; <sup>6</sup>Statistics Denmark; <sup>7</sup>Department of Public Health, University of Copenhagen; <sup>8</sup>Department of Chemistry and Bioscience, Aalborg University.

## Supplementary Note 1: Descriptive Statistics

From December 21, 2020 (week 52) to February 21, 2021 (week 7), Denmark had 68,169 SARS-CoV-2 cases identified with RT-PCR, of which, 35,684 (52%) were selected for WGS and 28,383 (42%) came back with a genome (Table S1).

Table S1: Summary statistics for all positive cases

| Week Number | First Weekday     | Cases N | Selected for WGS |    | With Genome |    | With B.1.17 |    |
|-------------|-------------------|---------|------------------|----|-------------|----|-------------|----|
|             |                   |         | N                | %  | N           | %  | N           | %  |
| 52          | December 21, 2020 | 16,934  | 4,501            | 27 | 3,606       | 21 | 64          | 2  |
| 53          | December 28, 2020 | 14,536  | 4,883            | 34 | 3,908       | 27 | 80          | 2  |
| 1           | January 4, 2021   | 11,289  | 5,390            | 48 | 4,142       | 37 | 154         | 4  |
| 2           | January 11, 2021  | 6,988   | 4,919            | 70 | 3,958       | 57 | 282         | 7  |
| 3           | January 18, 2021  | 5,318   | 4,489            | 84 | 3,680       | 69 | 470         | 13 |
| 4           | January 25, 2021  | 3,613   | 3,407            | 94 | 2,658       | 74 | 518         | 19 |
| 5           | February 1, 2021  | 3,117   | 2,851            | 91 | 2,235       | 72 | 663         | 30 |
| 6           | February 8, 2021  | 2,761   | 2,390            | 87 | 1,931       | 70 | 914         | 47 |
| 7           | February 15, 2021 | 3,613   | 2,854            | 79 | 2,265       | 63 | 1,489       | 66 |
| Total       |                   | 68,169  | 35,684           | 52 | 28,383      | 42 | 4,634       | 16 |

Notes: This table provides weekly summary statistics on all RT-PCR SARS-CoV-2 positive cases from December 21, 2020 to February 21, 2021. Weeks run from Monday to Sunday. It shows the total number of positive cases, the number of case samples selected for WGS, the number that were successfully sequenced, and the number with lineage B.1.1.7. Percentage of B.1.1.7 is calculated out of those with a successfully sequenced genome.

Lineage B.1.1.7 became increasingly dominant, crowding out other lineages, from December 2020 to February 21, 2021, (Figure S1).

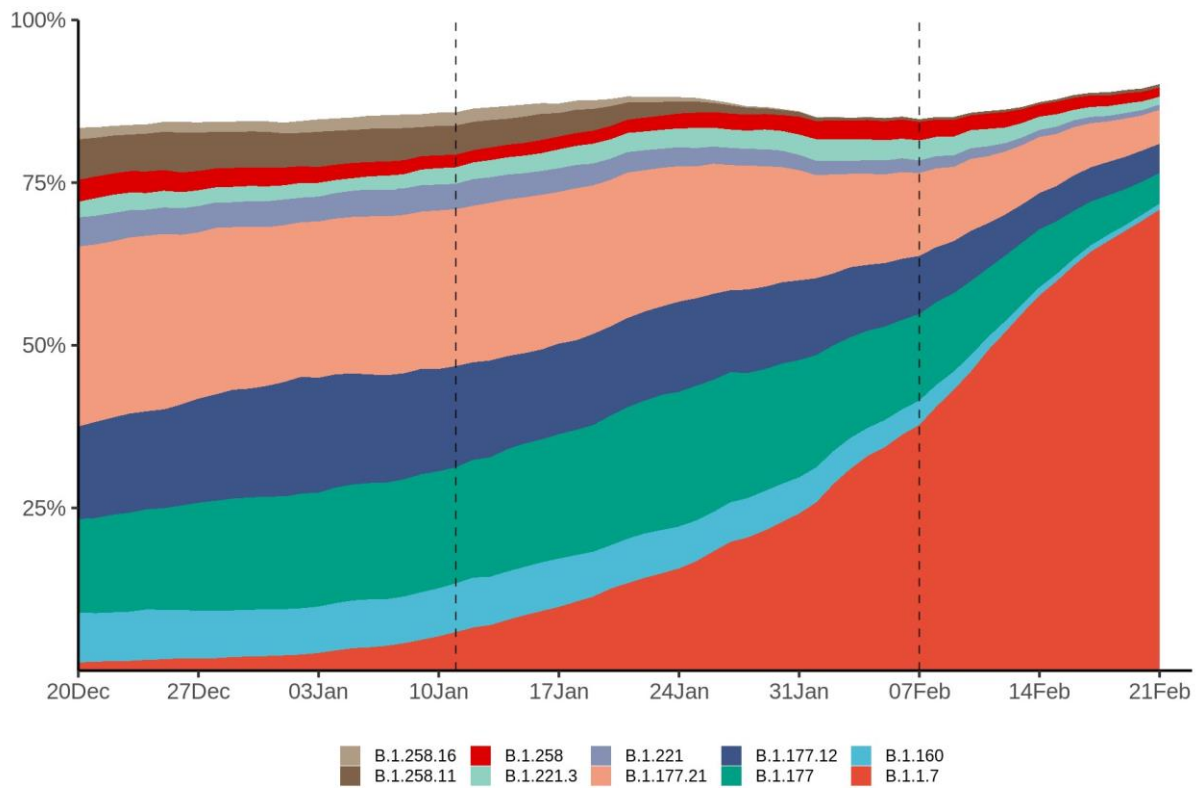

Figure S1: Frequency of detected WGS strains in Denmark over time.

Notes: This figure shows the ten most abundant lineages for cases with a complete genome in Denmark during the study period. Less abundant lineages are included in the white space. 14-day rolling average.

The proportion of cases being sampled varied over time depending on whether the cases occurred in TCDK or in hospitals (Figure S2).

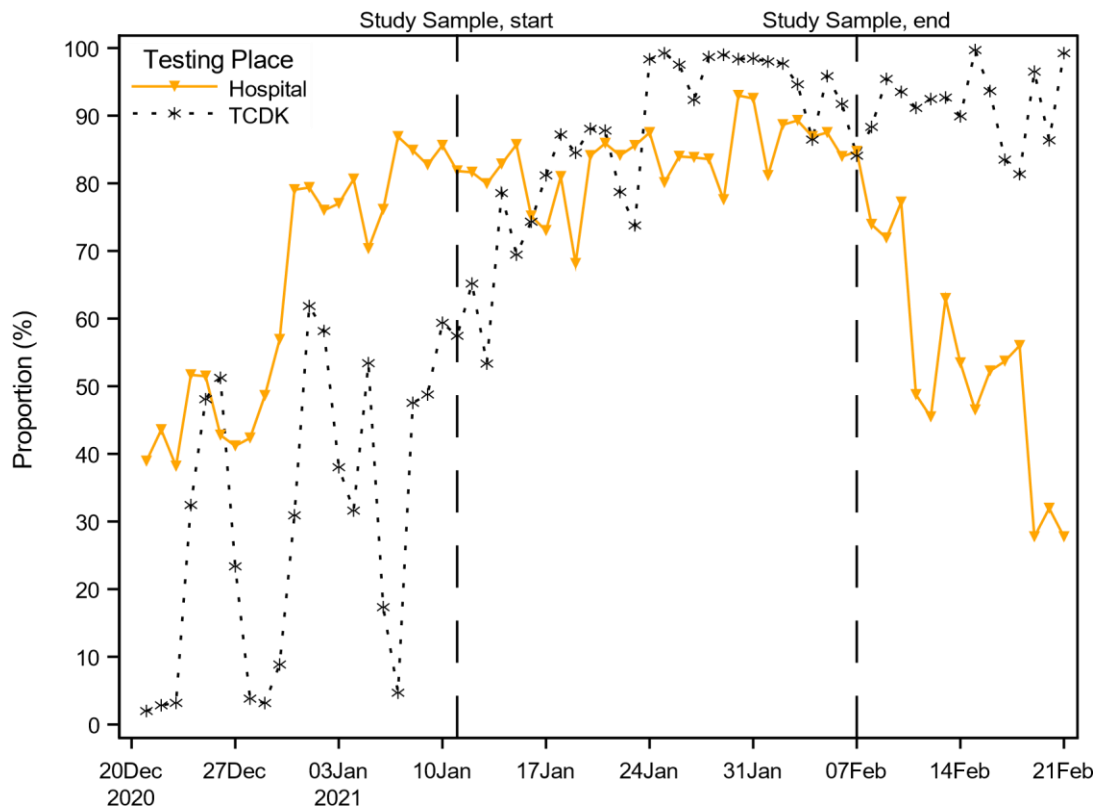

Figure S2: Proportion of positive RT-PCR tests sampled for WGS, stratified by testing facility

Notes: This figure shows the proportion of positive RT-PCR test cases that were selected for WGS stratified by testing facility (TCDK or hospital).

The proportion of cases selected for WGS and the proportion that came back with a genome is dependent on the Ct value (Figure S3). For positive tests with a Ct value of 18, 85% of the samples were selected for WGS (purple) and 76% came back with a genome (green). Thus, the success rate was 89% (76/85). Similarly, for positive tests with a Ct value of 38, 37% of the samples were selected for WGS and 5% came back with a genome. Thus, the success rate was 14% (5/37). The success rate starts to decline for tests with a Ct value  $\geq 30$ .

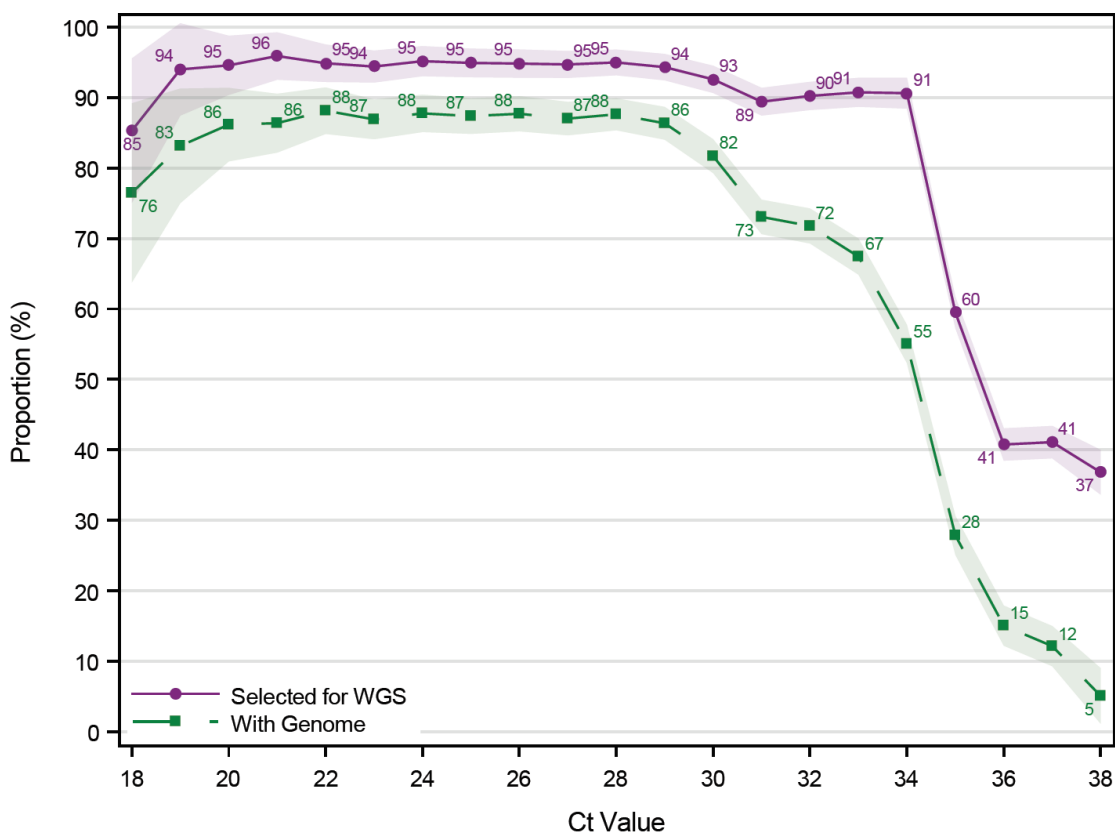

Figure S3: Proportion of positive RT-PCR tests sampled for WGS and with a successfully sequenced genome, by Ct value

Notes: This figure shows the proportion of cases selected for WGS and the proportion that were successfully sequenced stratified by the Ct value of the sample. For positive tests with a Ct value of 18, 85% of the samples were selected for WGS (purple) and 76% came back with a genome (green). Thus, the success rate was 89% (76/85). Similarly, for positive tests with a Ct value of 38, 37% of the samples were selected for WGS and 5% came back with a genome. Thus, the success rate was 14% (5/37). Only samples from TCDK are included and only from the study period (week 2 to 5, 2021). An RT-PCR test is positive if the Ct value is  $\leq 38$ . The markers show the estimates of the mean. The shaded areas show the 95% confidence bands of the estimates clustered on the household level.

The proportion of cases being sampled for WGS dependent on the Ct value varies over time (Figure S4). In week 2 TCDK started to sample systematically and to sample on Ct values. From Figure S4, we see that in week 2, TCDK used a Ct value cut-off of 30, 32, and 35. In weeks 3-6, TCDK used a Ct value cut-off of 35. Samples with higher Ct values ( $35 < Ct \leq 38$ ) were included, when WGS capacity allowed for it.

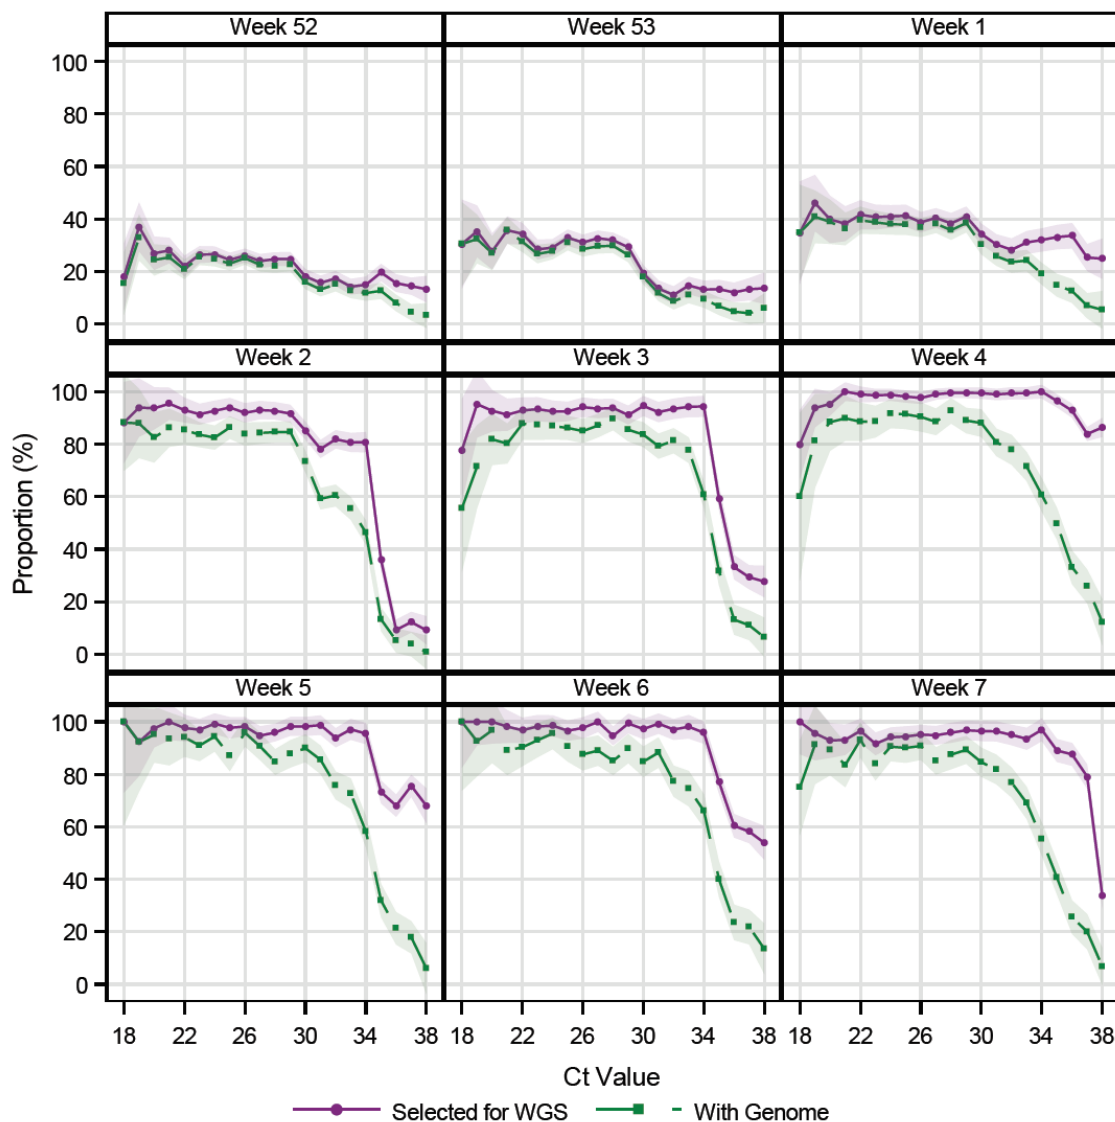

Figure S4: Proportion of positive RT-PCR tests sampled for WGS and with a genome, by Ct value and calendar week

Notes: This figure shows the proportion of cases selected for WGS and the proportion that were successfully sequenced stratified by the Ct value of the sample, across weeks. Only samples from TCDK are included. An RT-PCR test is positive if the Ct value is  $\leq 38$ . The markers show the estimates of the mean. The shaded areas show the 95% confidence bands of the estimates clustered on the household level.

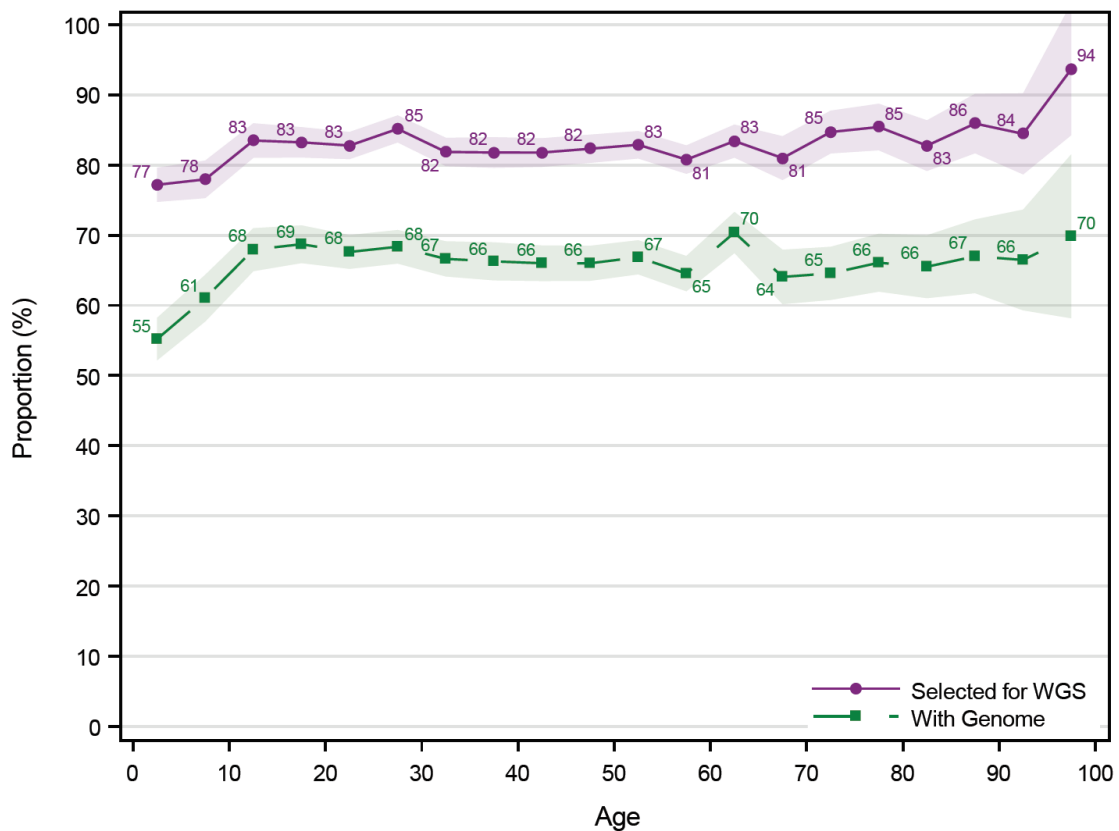

Figure S5: Proportion of positive RT-PCR tests sampled for WGS and with a successfully sequenced genome, by age.

Notes: This figure shows the proportion of cases selected for WGS and the proportion that were successfully sequenced stratified by the age of the samples person. Only samples from the study period (week 2 to 5, 2021) were included. An RT-PCR test is positive if the Ct value is  $\leq 38$ . The markers show the estimates of the mean. The shaded areas show the 95% confidence bands of the estimates clustered on the household level.

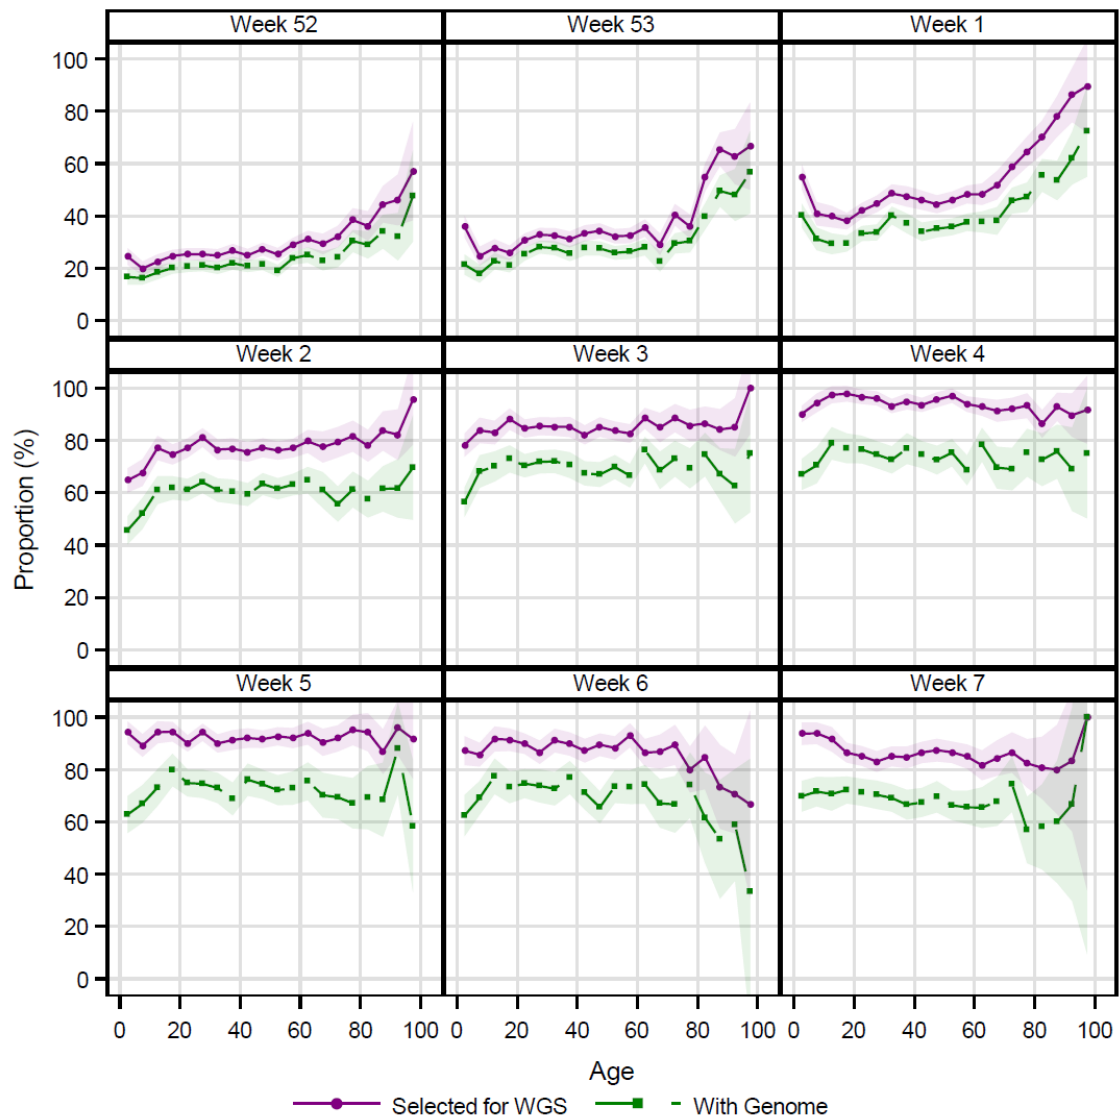

Figure S6: Proportion of positive RT-PCR tests sampled for WGS and with a genome, by age and calendar week.

Notes: This figure shows the proportion of cases selected for WGS and the proportion that were successfully sequenced stratified by the age of the samples person, across weeks. Only samples from TCDK are included. An RT-PCR test is positive if the Ct value is  $\leq 38$ . The markers show the estimates of the mean. The shaded areas show the 95% confidence bands of the estimates clustered on the household level.



The distribution of Ct values of the cases stratified by B.1.1.7 (red), other lineages (blue) are relatively similar, while samples with no genome (gray) have a distribution with higher Ct values (Figure S7).

WGS was mainly obtained for samples with low Ct values compared with the distribution of Ct values from the whole population (gray dotted line in Figure S7). We found that the Ct value distribution for B.1.1.7 and other lineages were approximately similar from week 1 to week 7 (Figure S7). We see a clear shift in the distribution of cases without a successfully sequenced genome from week 2, when SSI started to systematically select case samples on Ct values.

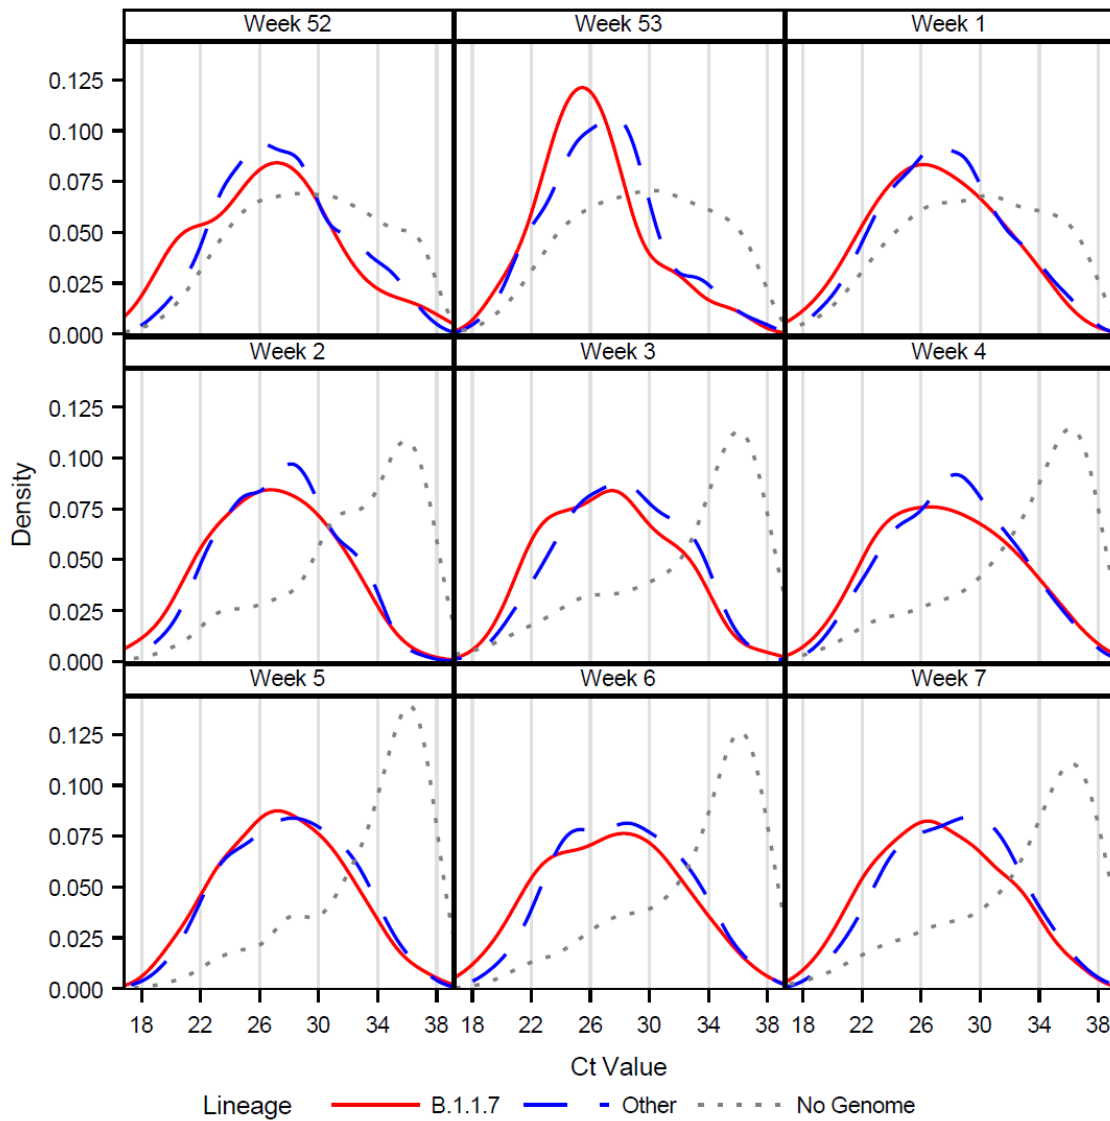

**Figure S7: Ct Value distributions by calendar week**

Notes: This figure shows the kernel density distributions of the Ct value for cases infected with B.1.1.7 (red), other lineages (blue), and without a successfully sequenced genome (gray). In week 2, 2021, SSI started systematic sampling on Ct values from tests from TCDK. Only samples from TCDK are included. An RT-PCR test is positive if the Ct value is  $\leq 38$ .

The distribution of the age of the cases stratified by B.1.1.7 (red), other lineages (blue) are relatively similar, although B.1.1.7 seems to mainly infect younger people in weeks 2-4 (Figure S8).

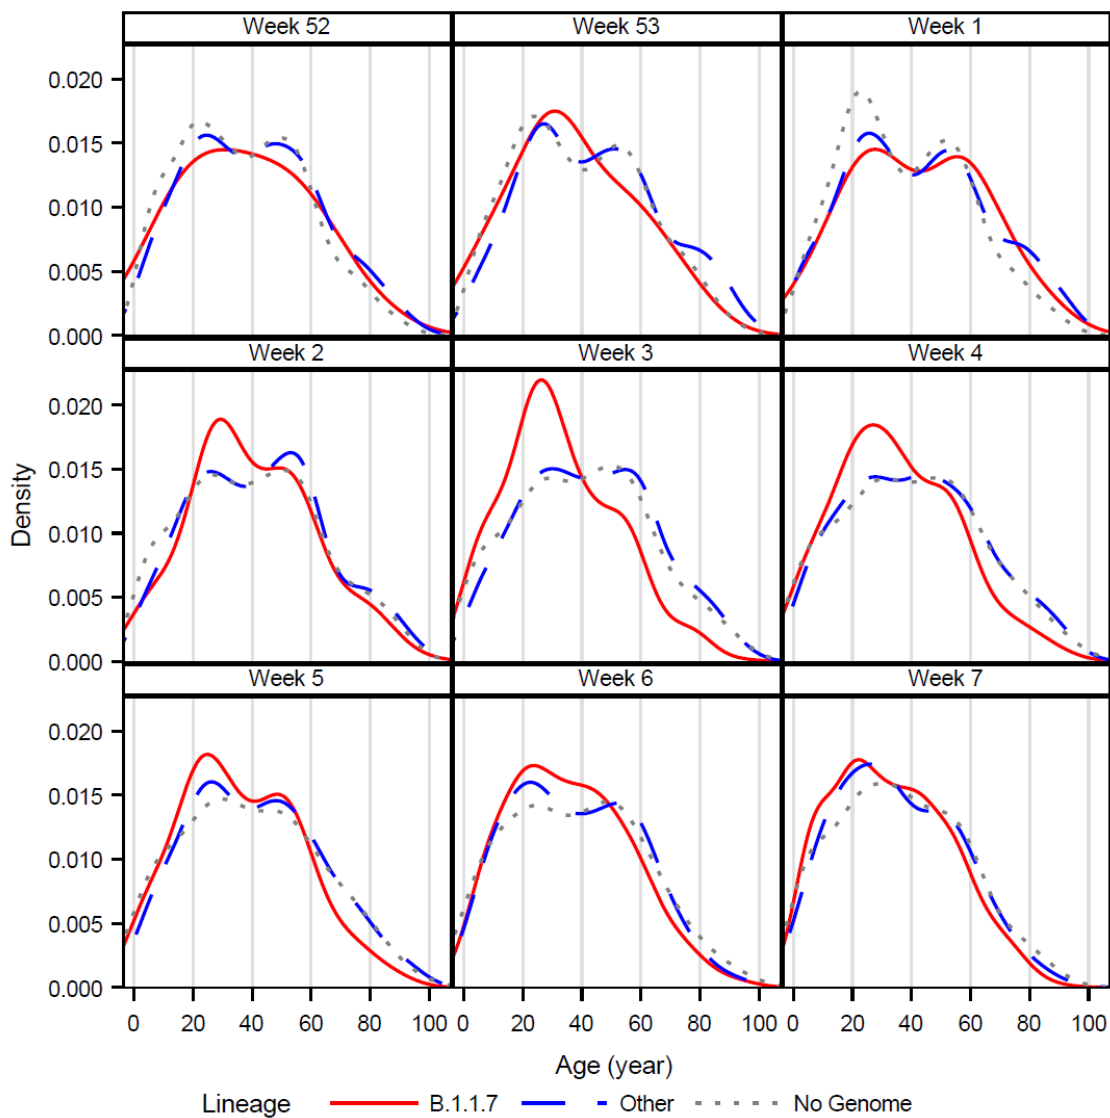

Figure S8: Age distributions by calendar week

Notes: This figure shows kernel density distributions of the age for cases infected with B.1.1.7 (red), other lineages (blue), and without a successfully sequenced genome (gray).

## Supplementary Note 3: Additional Analyses

Table S2: Summary statistics

|                           | Total | Primary Cases       |                |                 | Potential<br>Secondary<br>Cases | Positive<br>Secondary<br>Cases | Attack<br>Rate |          |
|---------------------------|-------|---------------------|----------------|-----------------|---------------------------------|--------------------------------|----------------|----------|
|                           |       | Selected<br>for WGS | With<br>Genome | With<br>B.1.1.7 |                                 |                                | (%)            | (95%-CI) |
| <b>Total</b>              | 8,093 | 6,632               | 5,241          | 808             | 16,612                          | 4,133                          | 25             | (24-26)  |
| <b>Sex</b>                |       |                     |                |                 |                                 |                                |                |          |
| Male                      | 3,648 | 3,013               | 2,406          | 419             | 8,905                           | 2,190                          | 25             | (24-26)  |
| Female                    | 4,445 | 3,619               | 2,835          | 389             | 7,707                           | 1,943                          | 25             | (24-26)  |
| <b>Age</b>                |       |                     |                |                 |                                 |                                |                |          |
| 0 - 5                     | 274   | 207                 | 148            | 36              | 1,975                           | 410                            | 21             | (19-23)  |
| 5 - 10                    | 145   | 120                 | 89             | 18              | 1,515                           | 412                            | 27             | (25-30)  |
| 10 - 15                   | 229   | 196                 | 159            | 29              | 1,684                           | 424                            | 25             | (23-27)  |
| 15 - 20                   | 566   | 474                 | 398            | 62              | 1,586                           | 331                            | 21             | (19-23)  |
| 20 - 25                   | 743   | 620                 | 495            | 104             | 1,217                           | 233                            | 19             | (17-21)  |
| 25 - 30                   | 788   | 674                 | 525            | 100             | 1,130                           | 261                            | 23             | (21-26)  |
| 30 - 35                   | 732   | 591                 | 473            | 83              | 1,017                           | 263                            | 26             | (23-29)  |
| 35 - 40                   | 621   | 510                 | 397            | 60              | 859                             | 220                            | 26             | (23-29)  |
| 40 - 45                   | 734   | 588                 | 464            | 61              | 1,025                           | 245                            | 24             | (21-27)  |
| 45 - 50                   | 730   | 594                 | 456            | 58              | 1,142                           | 276                            | 24             | (22-27)  |
| 50 - 55                   | 755   | 620                 | 495            | 79              | 1,147                           | 291                            | 25             | (23-28)  |
| 55 - 60                   | 688   | 546                 | 422            | 53              | 873                             | 245                            | 28             | (25-31)  |
| 60 - 65                   | 466   | 382                 | 324            | 26              | 609                             | 203                            | 33             | (30-37)  |
| 65 - 70                   | 203   | 157                 | 125            | 12              | 310                             | 112                            | 36             | (31-42)  |
| 70 - 75                   | 173   | 145                 | 105            | 12              | 235                             | 87                             | 37             | (31-43)  |
| 75 - 80                   | 127   | 110                 | 85             | 11              | 157                             | 63                             | 40             | (32-48)  |
| 80 - 85                   | 78    | 64                  | 56             | <5              | 96                              | 45                             | 47             | (37-57)  |
| 85 - 90                   | 41    | 34                  | 25             | <5              | 30                              | 12                             | 40             | (22-58)  |
| 90 - 95                   | -     | -                   | -              | -               | <5                              | 0                              | 0              | (.)      |
| >95                       | -     | -                   | -              | -               | <5                              | 0                              | 0              | (.)      |
| <b>Household<br/>Size</b> |       |                     |                |                 |                                 |                                |                |          |
| 2                         | 3,308 | 2,717               | 2,108          | 298             | 3,308                           | 1,019                          | 31             | (29-32)  |
| 3                         | 1,886 | 1,552               | 1,235          | 189             | 3,635                           | 843                            | 23             | (22-25)  |
| 4                         | 1,848 | 1,488               | 1,178          | 193             | 5,368                           | 1,292                          | 24             | (23-26)  |
| 5                         | 790   | 659                 | 534            | 92              | 3,042                           | 714                            | 23             | (21-26)  |
| 6                         | 261   | 220                 | 186            | 36              | 1,259                           | 265                            | 21             | (17-25)  |

Notes: This table provides summary statistics for the number of primary cases, potential secondary cases, positive secondary cases, and attack rates in the study, stratified by sex, age and household sizes. This table is the same as Table 1, except that age is separated into five-year age groups. 95% confidence intervals are clustered on the household level.

Table S3: Summary statistics split by primary case Ct value and their associated secondary cases

| <b>Ct Value</b>       | <b>Primary Cases</b> | <b>Potential Secondary Cases</b> | <b>Positive Secondary Cases</b> | <b>Attack Rate (%)</b> | <b>(95%-CI)</b> |
|-----------------------|----------------------|----------------------------------|---------------------------------|------------------------|-----------------|
| <b>B.1.1.7</b>        |                      |                                  |                                 |                        |                 |
| <18                   | 5                    | 12                               | 9                               | 75                     | (46-104)        |
| 18-20                 | 26                   | 57                               | 28                              | 49                     | (36-63)         |
| 20-22                 | 56                   | 134                              | 58                              | 43                     | (31-56)         |
| 22-24                 | 98                   | 198                              | 78                              | 39                     | (31-48)         |
| 24-26                 | 107                  | 225                              | 76                              | 34                     | (26-41)         |
| 26-28                 | 115                  | 236                              | 84                              | 36                     | (27-44)         |
| 28-30                 | 119                  | 245                              | 97                              | 40                     | (32-47)         |
| 30-32                 | 75                   | 158                              | 58                              | 37                     | (26-47)         |
| 32-34                 | 52                   | 121                              | 41                              | 34                     | (21-46)         |
| 34-36                 | 15                   | 35                               | 11                              | 31                     | (11-51)         |
| 36-38                 | 12                   | 24                               | 8                               | 33                     | (6-61)          |
| Total With Ct         | 680                  | 1,445                            | 548                             | 38                     | (35-41)         |
| Without Ct            | 128                  | 274                              | 108                             | 39                     | (31-48)         |
| Total                 | 808                  | 1,719                            | 656                             | 38                     | (35-41)         |
| <b>Other Lineages</b> |                      |                                  |                                 |                        |                 |
| <18                   | 6                    | 14                               | 8                               | 57                     | (29-86)         |
| 18-20                 | 76                   | 168                              | 83                              | 49                     | (39-59)         |
| 20-22                 | 225                  | 472                              | 159                             | 34                     | (28-40)         |
| 22-24                 | 448                  | 923                              | 296                             | 32                     | (28-36)         |
| 24-26                 | 550                  | 1,124                            | 291                             | 26                     | (23-29)         |
| 26-28                 | 658                  | 1,332                            | 359                             | 27                     | (24-30)         |
| 28-30                 | 588                  | 1,244                            | 315                             | 25                     | (22-28)         |
| 30-32                 | 470                  | 1,015                            | 239                             | 24                     | (20-27)         |
| 32-34                 | 326                  | 726                              | 172                             | 24                     | (20-28)         |
| 34-36                 | 109                  | 227                              | 51                              | 22                     | (16-29)         |
| 36-38                 | 36                   | 72                               | 9                               | 13                     | (2-23)          |
| Total With Ct         | 3,492                | 7,317                            | 1,982                           | 27                     | (26-28)         |
| Without Ct            | 941                  | 1,798                            | 507                             | 28                     | (26-31)         |
| Total                 | 4,433                | 9,115                            | 2,489                           | 27                     | (26-28)         |
| <b>No Genome</b>      |                      |                                  |                                 |                        |                 |
| <18                   | 15                   | 30                               | <5                              | 7                      | (-6-21)         |
| 18-20                 | 26                   | 51                               | 16                              | 31                     | (17-46)         |
| 20-22                 | 53                   | 107                              | 26                              | 24                     | (13-36)         |
| 22-24                 | 101                  | 180                              | 59                              | 33                     | (25-41)         |
| 24-26                 | 99                   | 216                              | 54                              | 25                     | (17-33)         |
| 26-28                 | 115                  | 234                              | 63                              | 27                     | (19-35)         |
| 28-30                 | 155                  | 313                              | 59                              | 19                     | (14-24)         |
| 30-32                 | 234                  | 498                              | 112                             | 22                     | (18-27)         |
| 32-34                 | 308                  | 666                              | 106                             | 16                     | (12-19)         |
| 34-36                 | 491                  | 979                              | 166                             | 17                     | (14-20)         |
| 36-38                 | 476                  | 1,011                            | 99                              | 10                     | (7-12)          |
| Total With Ct         | 2,073                | 4,285                            | 761                             | 18                     | (16-19)         |
| Without Ct            | 779                  | 1,493                            | 227                             | 15                     | (13-18)         |
| Total                 | 2,852                | 5,778                            | 988                             | 17                     | (16-18)         |

Notes: This table provides summary statistics for the number of primary cases divided by their sample Ct value together with their associated potential secondary cases and positive secondary cases. 95% confidence intervals are clustered on the household level.

Table S4 Summary statistics split by primary case age and their associated secondary cases

| Age                   | Primary Cases | Potential Secondary Cases | Positive Secondary Cases | Attack Rate (%) | (95%-CI) |
|-----------------------|---------------|---------------------------|--------------------------|-----------------|----------|
| <b>B.1.1.7</b>        |               |                           |                          |                 |          |
| 0-10                  | 54            | 141                       | 64                       | 45              | (34-57)  |
| 10-20                 | 91            | 242                       | 60                       | 25              | (17-33)  |
| 20-30                 | 204           | 380                       | 104                      | 27              | (21-34)  |
| 30-40                 | 143           | 343                       | 134                      | 39              | (32-46)  |
| 40-50                 | 119           | 293                       | 124                      | 42              | (35-50)  |
| 50-60                 | 132           | 234                       | 120                      | 51              | (43-59)  |
| 60-70                 | 38            | 50                        | 31                       | 62              | (49-75)  |
| 70-80                 | 23            | 32                        | 16                       | 50              | (32-68)  |
| 80-90                 | <5            | <5                        | <5                       | 75              | (33-117) |
| Total                 | 808           | 1,719                     | 656                      | 38              | (35-41)  |
| <b>Other Lineages</b> |               |                           |                          |                 |          |
| 0-10                  | 183           | 467                       | 113                      | 15              | (11-20)  |
| 10-20                 | 466           | 1,206                     | 202                      | 9               | (6-13)   |
| 20-30                 | 816           | 1,495                     | 299                      | 12              | (10-15)  |
| 30-40                 | 727           | 1,868                     | 520                      | 19              | (16-22)  |
| 40-50                 | 801           | 1,991                     | 596                      | 19              | (16-22)  |
| 50-60                 | 785           | 1,303                     | 432                      | 17              | (14-20)  |
| 60-70                 | 411           | 508                       | 201                      | 25              | (19-30)  |
| 70-80                 | 167           | 197                       | 83                       | 32              | (24-41)  |
| 80-90                 | 77            | 80                        | 43                       | 28              | (13-42)  |
| Total                 | 4,433         | 9,115                     | 2,489                    | 27              | (26-28)  |
| <b>No Genome</b>      |               |                           |                          |                 |          |
| 0-10                  | 182           | 472                       | 73                       | 24              | (19-29)  |
| 10-20                 | 238           | 594                       | 56                       | 17              | (14-20)  |
| 20-30                 | 511           | 930                       | 116                      | 20              | (18-22)  |
| 30-40                 | 483           | 1,191                     | 228                      | 28              | (25-31)  |
| 40-50                 | 544           | 1,323                     | 257                      | 30              | (27-33)  |
| 50-60                 | 526           | 846                       | 144                      | 33              | (30-36)  |
| 60-70                 | 220           | 268                       | 66                       | 40              | (35-44)  |
| 70-80                 | 110           | 114                       | 37                       | 42              | (35-50)  |
| 80-90                 | 38            | 40                        | 11                       | 54              | (42-65)  |
| Total                 | 2,852         | 5,778                     | 988                      | 17              | (16-18)  |

Notes: This table provides summary statistics for the number of primary cases divided by their age together with their associated potential secondary cases and positive secondary cases. 95% confidence intervals are clustered on the household level.

(a) Transmission Rate

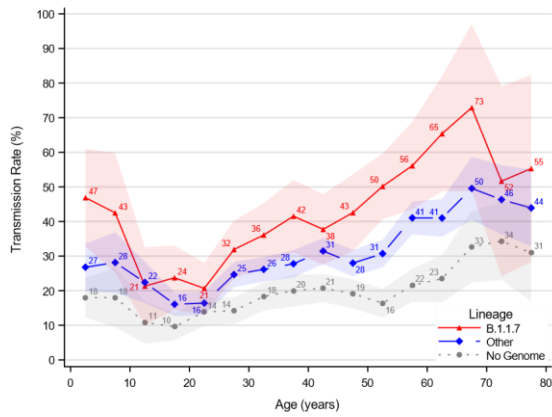

(b) Transmission Risk

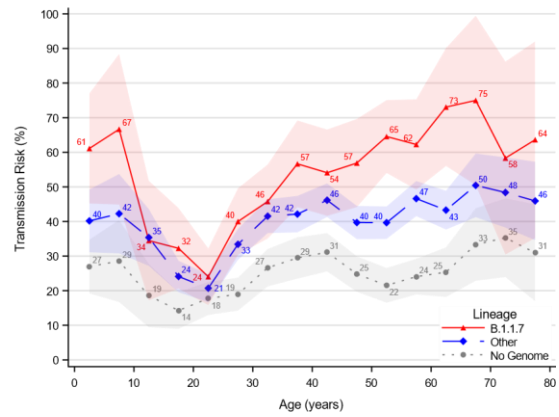

Figure S9: Age structured transmissibility stratified by lineage in five-year age groups.

Notes: The transmission rate describes the proportion of potential secondary cases within the household that were infected. The transmission risk describes the proportion of infected primary cases that infected at least one secondary case. This figure is the same as Figure 1, except that it shows five-year age groups.

The markers show the estimates of the mean. The shaded areas show the 95% confidence bands of the estimates clustered on the household level.

Primary cases infected with B.1.1.7 generally had a higher transmissibility compared with cases infected with other lineages, across Ct values (Figure S8 and S9).

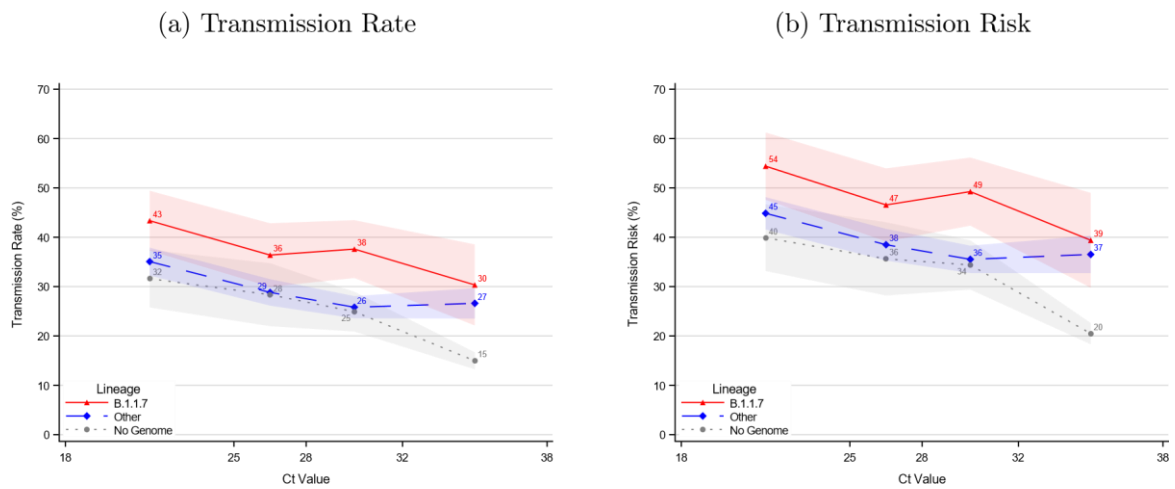

Figure S10: Transmissibility stratified by lineage and Ct value quartiles

Notes: The transmission rate describes the proportion of potential secondary cases within the household that were infected. The transmission risk describes the proportion of infected primary cases that infected at least one secondary case. The markers show the estimates of the mean. The shaded areas show the 95% confidence bands of the estimates clustered on the household level.

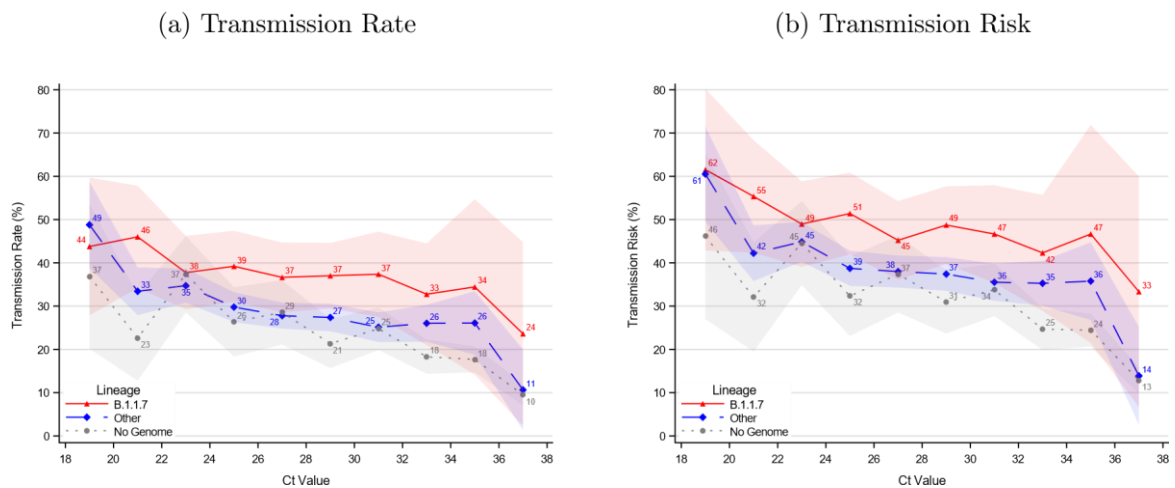

Figure S11: Transmissibility stratified by lineage and Ct values

Notes: The transmission rate describes the proportion of potential secondary cases within the household that were infected. The transmission risk describes the proportion of infected primary cases that infected at least one secondary case. The markers show the estimates of the mean. The shaded areas show the 95% confidence bands of the estimates clustered on the household level.



Table S5: Sensitivity analysis for the definition of co-primary cases: Odds ratio estimates

|                               | I           | II          | III         | IV          |
|-------------------------------|-------------|-------------|-------------|-------------|
| Days for including Sec. Cases | 1-14        | 2-14        | 3-14        | 4-14        |
| Transmission Rate, B.1.1.7    | 1.62        | 1.61        | 1.59        | 1.60        |
| 95%-CI                        | (1.39-1.90) | (1.37-1.89) | (1.35-1.88) | (1.34-1.90) |
| Transmission Risk, B.1.1.7    | 1.61        | 1.65        | 1.67        | 1.65        |
| 95%-CI                        | (1.36-1.90) | (1.38-1.98) | (1.37-2.03) | (1.34-2.04) |
| Constant                      | ✓           | ✓           | ✓           | ✓           |
| Age, Primary Case             | ✓           | ✓           | ✓           | ✓           |
| Ct Value                      | ✓           | ✓           | ✓           | ✓           |
| Observations                  | 8,762       | 8,590       | 8,348       | 8,224       |
| Households                    | 4,172       | 4,033       | 3,847       | 3,761       |

Notes: This table shows sensitivity analysis results for the transmission rate and transmission risk when restricting the inclusion criteria for secondary cases. Column I includes secondary cases that tested positive on days 1-14, i.e., the same as in the paper. Column II only includes secondary cases that tested positive on days 2-14. Column III includes secondary cases that tested positive on days 3-14. Column IV includes secondary cases that tested positive on days 4-14. 95% confidence intervals clustered on the household level.

Table S6: Odds ratio estimates for transmissibility for B.1.1.7 compared with other lineages, excluding households with co-primary cases

|                     | Transmission Rate |             |             |             | Transmission Risk |             |             |
|---------------------|-------------------|-------------|-------------|-------------|-------------------|-------------|-------------|
|                     | I                 | II          | III         | IV          | V                 | VI          | VII         |
| B.1.1.7             | 1.49              | 1.70        | 1.70        | 1.64        | 1.52              | 1.68        | 1.63        |
| 95%-CI              | (1.29-1.72)       | (1.46-1.97) | (1.47-1.97) | (1.39-1.93) | (1.30-1.78)       | (1.43-1.97) | (1.37-1.94) |
| Constant            | ✓                 | ✓           | ✓           | ✓           | ✓                 | ✓           | ✓           |
| Age, Primary Case   |                   | ✓           | ✓           | ✓           |                   | ✓           | ✓           |
| Age, Pot. Sec. Case |                   |             | ✓           | ✓           |                   |             |             |
| Ct Value            |                   |             |             | ✓           |                   |             | ✓           |
| Observations        | 10,295            | 10,295      | 10,295      | 8,286       | 10,295            | 10,295      | 8,286       |
| Households          | 4,948             | 4,948       | 4,948       | 3,912       | 4,948             | 4,948       | 3,912       |

Notes: This table is comparable to Table 3, but excluding households with co-primary cases, i.e., more than one (primary) case identified on day zero. Columns I-IV provide odds ratio estimates for the increased transmission rate of B.1.1.7 compared with other lineages. Columns V-VII show the same for the transmission risk. Column I provides the crude estimates, i.e., only with a constant and without any controls. Column II further includes fixed effects for ten-year age groups of the primary cases. Column III further includes the age of potential secondary cases. Column IV further includes fixed effects for Ct values in bi-value groups. This sample is further restricted to only include primary cases identified in TCDK, as we only have Ct values on those. Column V provides the crude estimates, i.e., only with a constant and without any controls. Column VI further includes fixed effects for ten-year age groups of the primary cases. Column VII further includes fixed effects for Ct values in bi-value groups. This sample is further restricted to only include primary cases identified in TCDK, as we only have Ct values on those. All effects are included as fixed effects. Pot. Sec. Case = Potential Secondary Cases. Only primary cases identified in TCDK are included in models with Ct values. 95% confidence intervals clustered on the household level.

(a) Transmission Rate

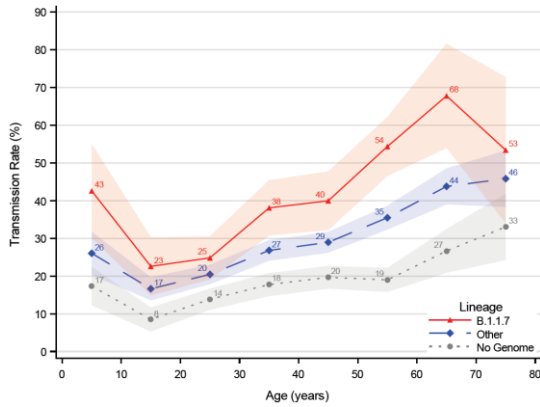

(b) Transmission Risk

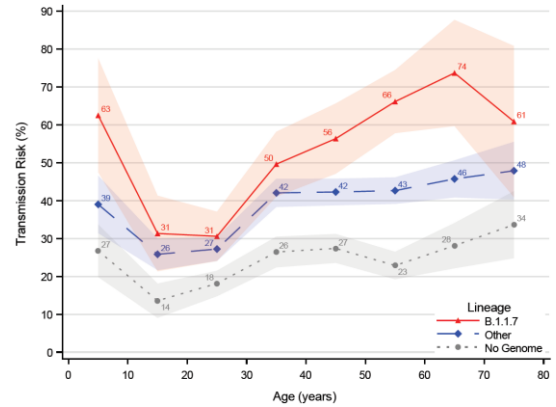

Figure S12: Age structured transmissibility stratified by lineage of the primary case, , excluding households with co-primary cases

Notes: This figure is comparable to Figure 1, but excluding households with co-primary cases, i.e., more than one (primary) case identified on day zero. The transmission rate describes the proportion of potential secondary cases within the household that were infected. The transmission risk describes the proportion of infected primary cases that infected at least one secondary case. Figure S7 provides the same graphs for five-year age groups. The markers show the estimates of the mean. The shaded areas show the 95% confidence bands of the estimates clustered on the household level.

(a) Transmission Rate

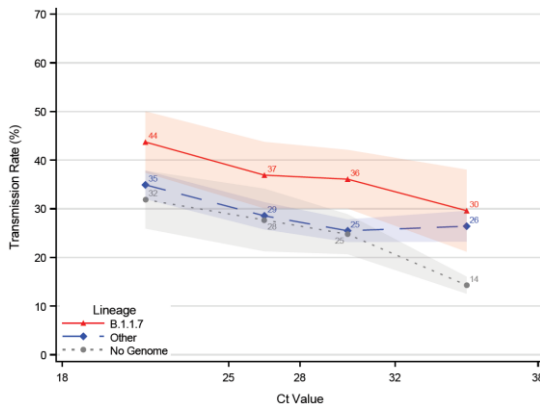

(b) Transmission Risk

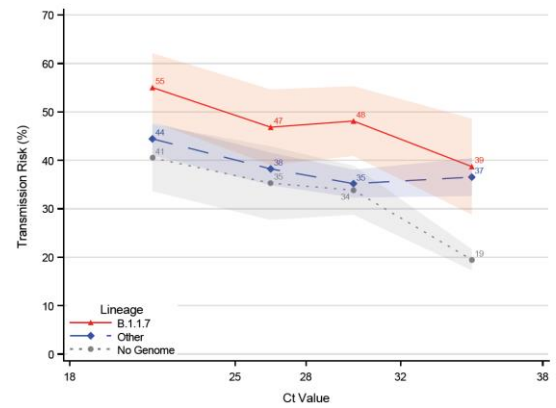

Figure S13: Transmissibility stratified by lineage and Ct value quartiles, excluding households with co-primary cases

Notes: This figure is comparable to Figure S8, but excluding households with co-primary cases, i.e., more than one (primary) case identified on day zero. The transmission rate describes the proportion of potential secondary cases within the household that were infected. The transmission risk describes the proportion of infected primary cases that infected at least one secondary case. The markers show the estimates of the mean. The shaded areas show the 95% confidence bands of the estimates clustered on the household level.

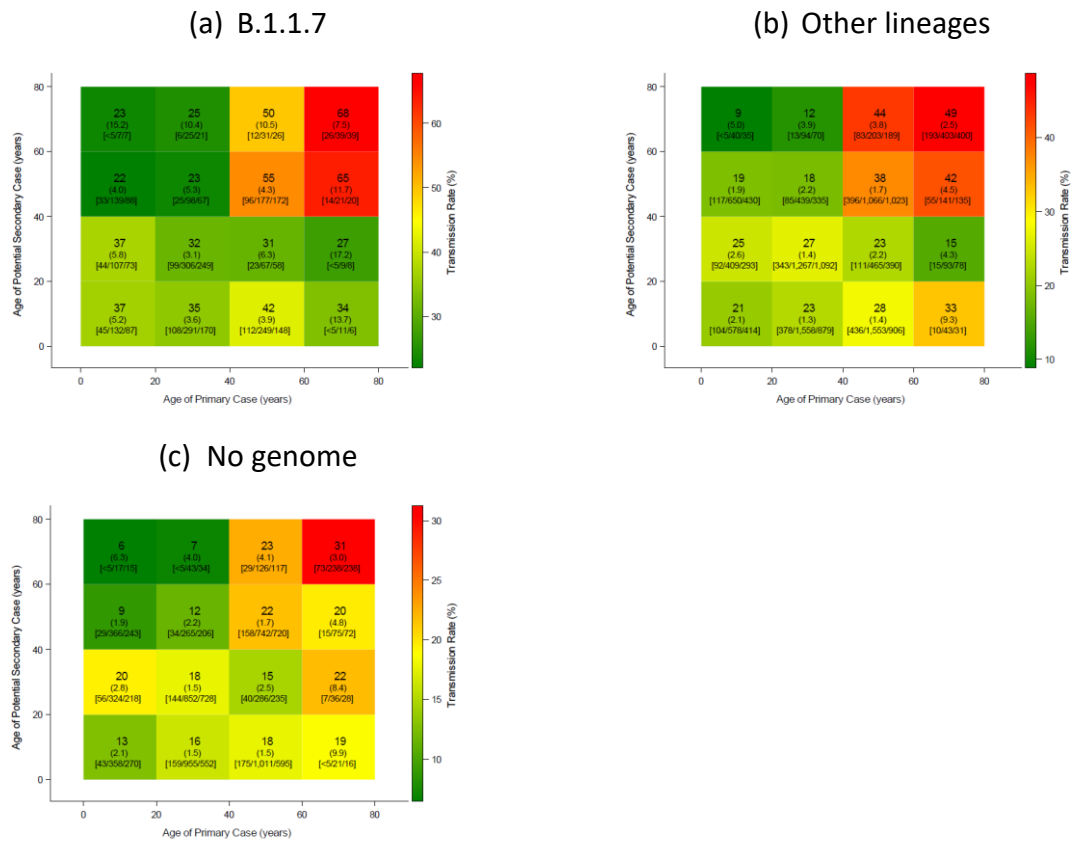

Figure S14: Age-by-age transmission rate stratified by lineage

Notes: This figure provides estimates of the transmission rate for each combination of age of the primary and potential secondary case, stratified by the lineage of the primary case. (.) Standard errors of the estimates are clustered on the household level. [././] Number of primary cases / number of potential secondary cases / number of positive secondary cases.

## Supplementary Note 3: Statistical Analyses

### Age Structured Transmissibility

To estimate the association between age and transmission rate, stratified by lineage, we estimated the non-parametric regression equation:

$$y_p = \beta \times \text{Age}_{p,10} + \varepsilon_p, \quad (1)$$

where  $\text{Age}_{p,10}$  is the age (in ten-year groups) of the primary case.  $\beta$  measures the transmission rate for each ten-year age group of the primary cases.  $\varepsilon_p$  denotes the error term, clustered on the household (event) level.

### Additive vs. Multiplicative Effect of B.1.1.7 Transmissibility

We wanted to evaluate whether the effect of being infected with B.1.1.7 relative to being infected with other lineages was additive or multiplicative, which is important for designing proper simulation models. With binomial outcomes the canonical link function is the logit function which corresponds to a multiplicative effect. An additive effect of the covariates can be modelled by using the identity link in a generalized linear regression model.

Thus, to estimate the transmissibility effect of B.1.1.7 compared with other lineages, we estimated the model with the following linear predictor:

$$\eta = \text{Constant} + \text{B.1.1.7} + \text{Age}_p + \text{Age}_{p,s} + \text{Ct}_p + \varepsilon_p, \quad (2)$$

while varying the link function to compare the model fit of an additive versus a multiplicative effect.

As the two models include the same parameters, the model fits can be compared using the Akaike Information Criterion (AIC). Furthermore, reduced versions of the linear predictors were tested. Across all three model specifications and for both transmission rate and transmission risk, we found that the logit model had a lower AIC and, thereby, was a better fit

compared with the identity model, implying that the increased transmissibility is multiplicative and not additive (Table S7 and S8).

Table S7: Comparison of additive vs. multiplicative effect, Transmission Rate

|                     | Linear | Logit  | Linear | Logit  | Linear | Logit |
|---------------------|--------|--------|--------|--------|--------|-------|
| AIC                 | 6,280  | 6,277  | 6,302  | 6,273  | 4,963  | 4,953 |
| B.1.1.7             | ✓      | ✓      | ✓      | ✓      | ✓      | ✓     |
| Constant            | ✓      | ✓      | ✓      | ✓      | ✓      | ✓     |
| Age, Primary Case   | ✓      | ✓      | ✓      | ✓      | ✓      | ✓     |
| Age, Pot. Sec. Case |        |        | ✓      | ✓      | ✓      | ✓     |
| Ct Value            |        |        |        |        | ✓      | ✓     |
| Observations        | 10,834 | 10,834 | 10,834 | 10,834 | 8,762  | 8,762 |
| Households          | 5,241  | 5,241  | 5,241  | 5,241  | 4,172  | 4,172 |

Notes: This table provides a comparison of an additive and multiplicative model using the Akaike Information Criteria (AIC). The transmission rate describes the proportion of potential secondary cases within the household that were infected.

Table S8: Comparison of additive vs. multiplicative effect, Transmission Risk

|                   | Linear | Logit  | Linear | Logit |
|-------------------|--------|--------|--------|-------|
| AIC               | 6,900  | 6,898  | 5,455  | 5,455 |
| B.1.1.7           | ✓      | ✓      | ✓      | ✓     |
| Constant          | ✓      | ✓      | ✓      | ✓     |
| Age, Primary Case | ✓      | ✓      | ✓      | ✓     |
| Ct Value          |        |        | ✓      | ✓     |
| Observations      | 10,834 | 10,834 | 8,762  | 8,762 |
| Households        | 5,241  | 5,241  | 4,172  | 4,172 |

Notes: This table provides a comparison of an additive and multiplicative model using the Akaike Information Criteria (AIC). The transmission risk describes the proportion of infected primary cases that infected at least one secondary case.
