# Supplementary material for: Increased transmissibility of SARS-CoV-2 lineage B.1.1.7 by age and viral load
Source: PubMed Central journal article supplement (PMC8669007; doi:10.1038/s41467-021-27202-x), 2021-12-13
Supplement: 41467_2021_27202_MOESM4_ESM.pdf [file 41467_2021_27202_MOESM4_ESM.pdf]

## **Description of Additional Supplementary Files**

Supplementary Data 1: GISAID Accession IDs
